# Supplementary material for: Robust Dirac spin gapless semiconductors in a two-dimensional oxalate based organic honeycomb-kagome lattice
Source: Royal Society of Chemistry journal article supplement (doi:10.1039/d1nr07076b), 2022-01-01
Supplement: d1nr07076b1.pdf [file d1nr07076b1.pdf]

## Supporting Information

### Robust Dirac spin gapless semiconductors in a two-dimensional oxalate based organic HK lattice

Jianpei Xing<sup>1</sup>, Xue Jiang<sup>1\*</sup>, Zhifeng Liu<sup>2</sup>, Yan Qi<sup>1,3</sup>, Jijun Zhao<sup>1</sup>

<sup>1</sup>Key Laboratory of Materials Modification by Laser, Ion and Electron Beams (Dalian University of Technology), Ministry of Education, Dalian 116024, China

<sup>2</sup>School of Physical Science and Technology, Inner Mongolia University, Hohhot 010021, China

<sup>3</sup>School of Physics and Materials Engineering, Dalian Minzu University, Dalian 116600, China

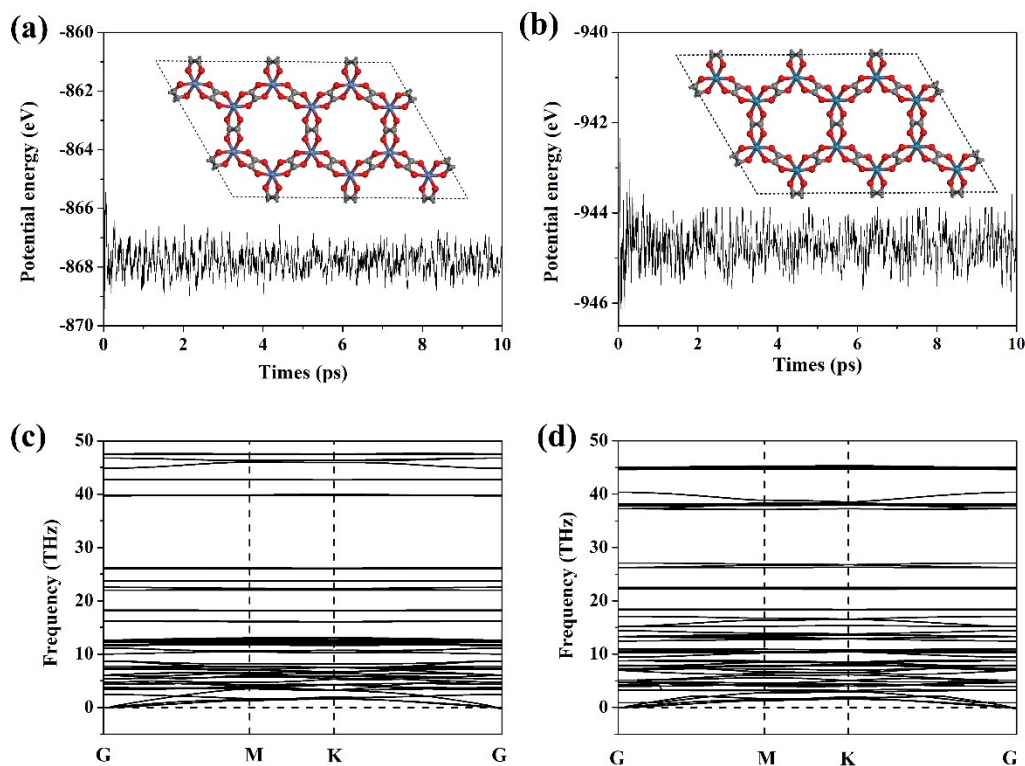

**Fig. S1.** (a, b) The *ab-initio* molecular dynamic (AIMD) simulation under 300 K with 10 ps timescale, and (c, d) the phonon spectrum of  $\text{Ni}_2(\text{C}_2\text{O}_4)_3$  (left) and  $\text{Re}_2(\text{C}_2\text{O}_4)_3$  (right), respectively.

\* Corresponding Author. Email: jiangx@dlut.edu.cn (Xue Jiang).

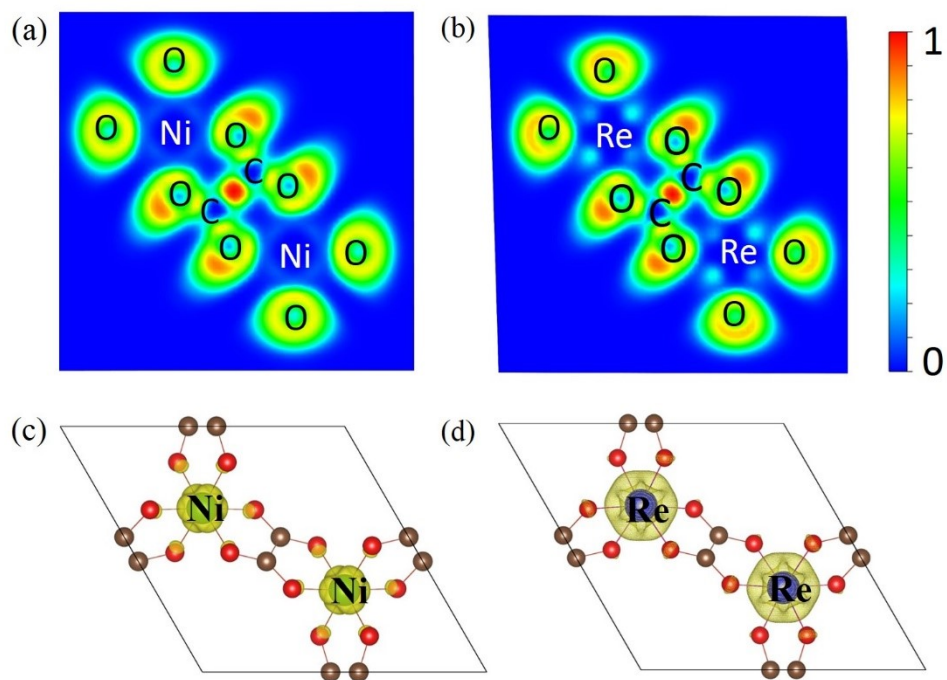

**Fig S2.** (a, b) The 2D plane ELF of  $\text{Ni}_2(\text{C}_2\text{O}_4)_3$  and  $\text{Re}_2(\text{C}_2\text{O}_4)_3$  with isosurface  $0.4e/\text{Born}^3$ . The red and the blue parts denote the electron accumulation and dispersion, respectively. (c, d) The spin charge density of  $\text{Ni}_2(\text{C}_2\text{O}_4)_3$  (left) and  $\text{Re}_2(\text{C}_2\text{O}_4)_3$  (right). Here the yellow area represents the spin charge localized region.

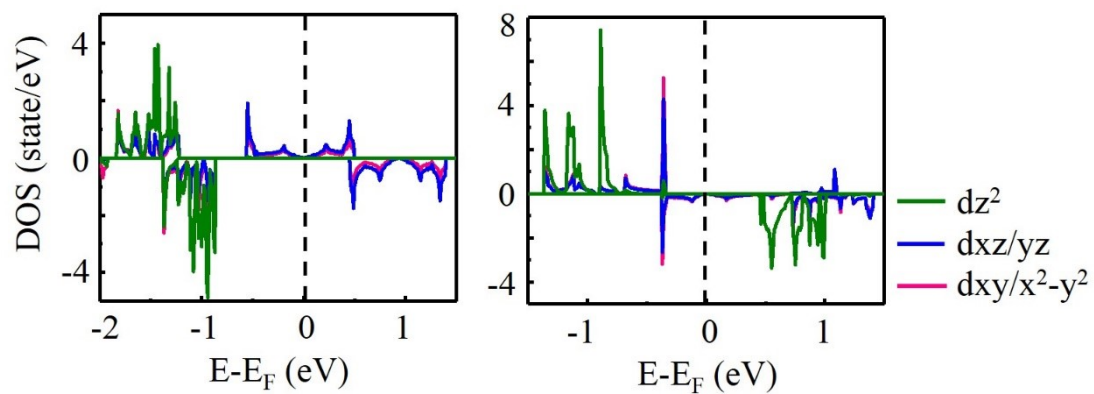

**Fig S3.** The PDOS of  $d$  orbitals of Ni and Re in Ni<sub>2</sub>(C<sub>2</sub>O<sub>4</sub>)<sub>3</sub> (left) and Re<sub>2</sub>(C<sub>2</sub>O<sub>4</sub>)<sub>3</sub> (right), respectively. The Fermi level ( $E_F$ ) is set to zero.

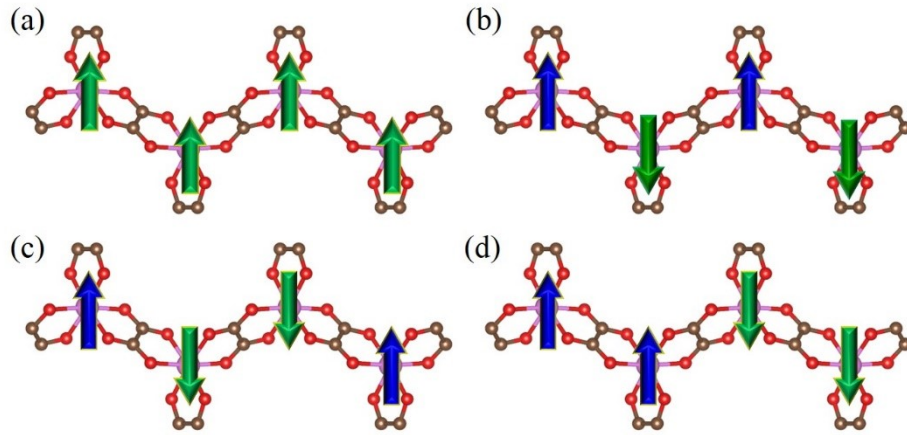

**Fig. S4.** Four possible magnetic configurations: (a) ferromagnet (FM), (b) Neel antiferromagnet (NAFM), (c) strip antiferromagnet (SAFM) and (d) zigzag antiferromagnet (ZAFM) for  $\text{TM}_2(\text{C}_2\text{O}_4)_3$ .

**Scheme S1.** To assess the experimental feasibility of 2D  $\text{TM}_2(\text{C}_2\text{O}_4)_3$ , the  $3\times 3$  supercell of Ag (111) substrate and  $4\times 4$  supercell of graphene substrate are screened to grow  $\text{Ni}_2(\text{C}_2\text{O}_4)_3$  and  $\text{Re}_2(\text{C}_2\text{O}_4)_3$ . Their lattice mismatch is about 1.25% and 3.69%, respectively. Based on the first-principle calculations, the distance between  $\text{TM}_2(\text{C}_2\text{O}_4)_3$  and substrate are about 2.5 Å and 3.3 Å for  $\text{Ni}_2(\text{C}_2\text{O}_4)_3$  and  $\text{Re}_2(\text{C}_2\text{O}_4)_3$ . Meanwhile, the structures and magnetic properties are well retained.

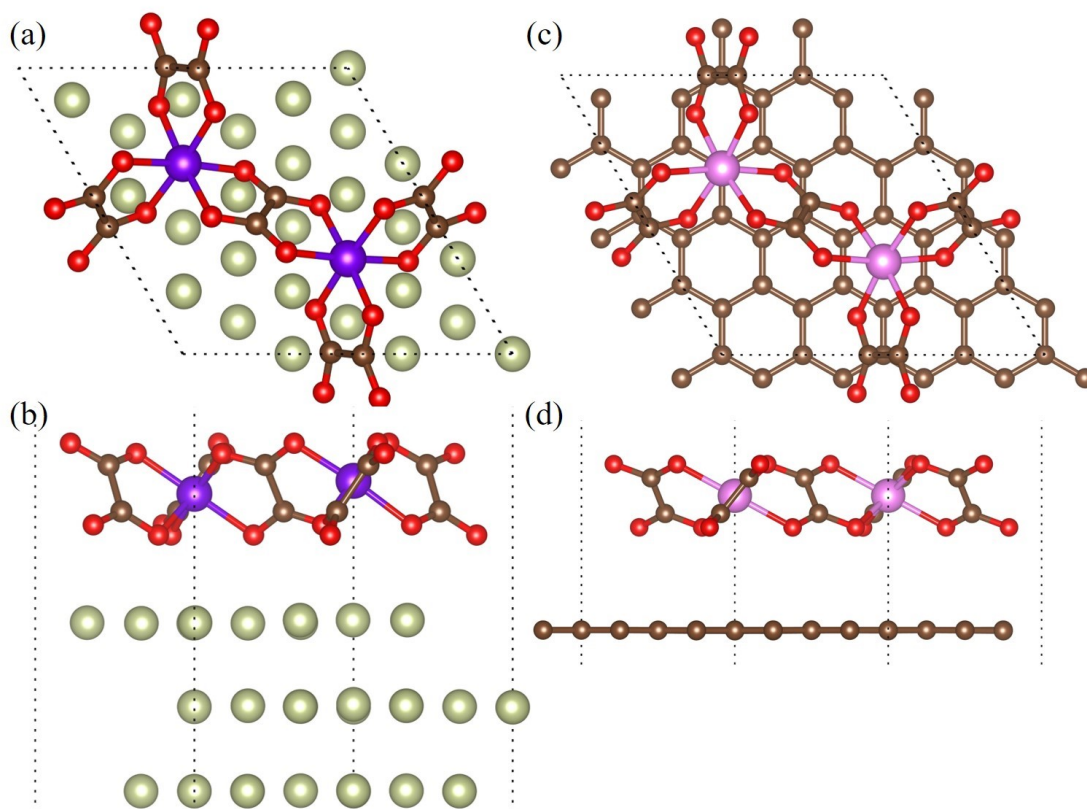

**Fig. S5.** (a) Top view and (b) side view of  $\text{Ni}_2(\text{C}_2\text{O}_4)_3$  on Ag(111) substrate, and (c) top view and (d) side view of  $\text{Re}_2(\text{C}_2\text{O}_4)_3$  on graphene monolayer.

**Scheme S2.** Considering the first and second nearest-neighbor magnetic exchange interactions, the Hamiltonian of a classical Heisenberg model can be written as Eq. (S1)

$$H = - \sum_{mn} J_1 M_m M_n - \sum_{kl} J_2 M_k M_l - \sum_{ij} J_3 M_i M_j \quad (\text{S1})$$

where  $J_1$ ,  $J_2$  and  $J_3$  are the first, second and third nearest-neighbor exchange parameters, respectively; the magnetic moments for per TM in 2D  $\text{Ni}_2(\text{C}_2\text{O}_4)_3$  and  $\text{Re}_2(\text{C}_2\text{O}_4)_3$  are  $0.83 \mu_B$  and  $1.82 \mu_B$ . Based on the calculated total energies of different magnetic configurations, three different magnetic configurations are chosen.

The exchange parameters  $J_1$ ,  $J_2$  and  $J_3$  for  $\text{Ni}_2(\text{C}_2\text{O}_4)_3$  can be derived by following equations

$$E(\text{FM}) = -(6J_1 + 12J_2 + 6J_3) M^2$$

$$E(\text{AFM}_1) = -(2J_1 - 4J_2 - 6J_3) M^2$$

$$E(\text{AFM}_2) = -(-6J_1 + 12J_2 - 6J_3) M^2$$

$$E(\text{AFM}_3) = -(-2J_1 + 12J_2 - 6J_3) M^2$$

$$J_1 = \frac{-192E_1 + 224E_2 + 192E_3}{3456M^2}$$

$$J_2 = \frac{96E_1 - 112E_2 + 120E_3}{3456M^2}$$

$$J_3 = \frac{192E_1 + 64E_2 - 192E_3}{3456M^2}$$

Here,  $E_1 = E(\text{AFM}_1) - E(\text{FM})$ ,  $E_2 = E(\text{AFM}_2) - E(\text{FM})$  and  $E_3 = E(\text{AFM}_3) - E(\text{FM})$ ,  $M = 0.83 \mu_B$ .

For  $\text{Re}_2(\text{C}_2\text{O}_4)_3$ , it only has one kind of AFM configuration (Néel AFM as shown in Fig. S4(b)) and other two configurations are ferrimagnetic. Only considering one AFM configuration, the expression of  $E(\text{FM})$  and  $E(\text{AFM})$  can be written as:

$$E(\text{FM}) = -6J_1 M^2$$

$$E(\text{AFM}) = -2J_1 M^2$$

and

$$J = \frac{E}{4M^2}$$

Here,  $E = E(\text{AFM}) - E(\text{FM})$ ,  $M = 1.82 \mu_{\text{B}}$ .

The calculated  $J_1$  for  $\text{Re}_2(\text{C}_2\text{O}_4)_3$  is 3.73 meV. The  $J_1, J_2$  and  $J_3$  for  $\text{Ni}_2(\text{C}_2\text{O}_4)_3$  are 69.75 meV,  $-1.38$  meV, and  $-6.28$  meV, respectively, which show that the second and third neighbor coupling are very weak and can be neglected, and first neighbor magnetic exchange couplings are FM coupling.
